# Supplementary material for: Planes y Directrices
Source: Royal Society of Chemistry journal article supplement (doi:10.1039/c2dt12002j), 2009-01-01
Supplement: c2dt12002j.pdf [file c2dt12002j.pdf]

# Supporting Information

## Guest dependent pressure behavior of the flexible MIL-53(Cr) : A computational exploration

Qintian Ma,<sup>a,b</sup> Qingyuan Yang,<sup>a,b</sup> Aziz Ghoufi,<sup>c</sup> Gérard Férey,<sup>d</sup> Chongli Zhong<sup>a</sup>

and Guillaume Maurin<sup>b</sup>

<sup>a</sup> Department of Chemical Engineering, Beijing University of Chemical Technology, P.O. Box 100 Beijing 100029, China. Fax: +86 10 64419862; Tel: +86 10 64419862; E-mail : [zhongcl@mail.buct.edu.cn](mailto:zhongcl@mail.buct.edu.cn)

<sup>b</sup> Institut Charles Gerhardt Montpellier, Université Montpellier 2, 34095 Montpellier cedex 05, France. Fax: +33 4 67 14 42 90; Tel: +33 4 67 14 33 07; E-mail: [guillaume.maurin@univ-montp2.fr](mailto:guillaume.maurin@univ-montp2.fr)

<sup>c</sup> Institut de Physique de Rennes, CNRS-University of Rennes 1, UMR 6251, 35042 Rennes, France

<sup>d</sup> Institut Lavoisier Versailles, Université de Versailles St-Quentin, 45, avenue des France, 78035 Versailles cedex, France.

## 1. Charge distribution for the framework of MIL-53 (Cr)

The periodic model of the MIL-53 (Cr) material was first geometry optimized, using the crystallographic coordinates of the atoms as starting configurations.<sup>1</sup> The partial charges for all the atoms of the framework were then extracted using periodic density functional theory (DFT) calculations and Mulliken charge partitioning method as previously reported.<sup>2</sup> The Accelrys DMol3 code<sup>3</sup> was used for these calculations, which were performed using the PW91 GGA functional,<sup>4</sup> and the double numerical basis set containing polarization functions on hydrogen atoms (DNP).<sup>5</sup> The resulting charges carried by all the atoms are reported in Table S1, the location of each atom type on the framework being detailed in Fig. S1.

**Table S1** Atomic partial charges carried by the MIL-53(Cr) framework atoms

| Atoms       | h_c    | cg1     | cg2     | c_c    | o_c    | Cr    | $\mu_2_o$ | h_o   |
|-------------|--------|---------|---------|--------|--------|-------|-----------|-------|
| Charges (e) | 0.1393 | -0.0739 | -0.0739 | 0.6126 | -0.506 | 1.031 | -0.637    | 0.291 |

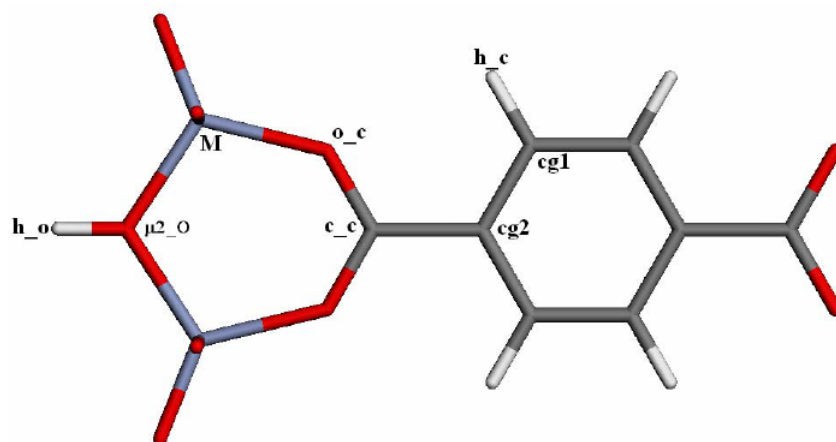

**Fig. S1** Labels of the atoms for the organic and inorganic parts in MIL-53 (Cr), corresponding to the force field atom types, to allow the easy reading of Tables S1-S3. M represents the Cr atom.

## 2. Flexible force field used for the MIL-53(Cr)

In the recently refined force field,<sup>6</sup> the intramolecular force constants for the organic moiety were extracted from the widely used Consistent Valence Force Field (CVFF)<sup>7</sup> with a slight adjustment (see Table S2). The bond stretching, angle bending and torsion potentials are described by the following terms:

$$E_{ij}^{bond} = \frac{1}{2}k_{ij}(r_{ij} - r_0)^2 \quad (1)$$

$$E_{ijk}^{bending} = \frac{1}{2}k_{ijk}(\theta_{ijk} - \theta_0)^2$$

$$E_{ijkl}^{torsion} = k_{ijkl}[1 + \cos(n\phi_{ijkl} - \phi_0)]$$

where  $k_{ij}$ ,  $k_{ijk}$  and  $k_{ijkl}$  are the force constants for the different interactions,  $r_{ij}$  is the distance separating two atoms  $i$  and  $j$ ,  $\theta_{ijk}$  and  $\theta_0$  are the angle involving three atoms  $i$ ,  $j$ ,  $k$  and the equilibrium angle respectively,  $n$  is the periodicity,  $\phi$  is the dihedral angle and  $\phi_0$  is the factor phase. The non-bonded Lennard-Jones (LJ) parameters (Eq. 2) for describing the interactions between the organic parts are given in Table S2.

$$E_{ij}^{LJ} = 4\varepsilon_{ij} \left[ \left( \frac{\sigma_{ij}}{r_{ij}} \right)^{12} - \left( \frac{\sigma_{ij}}{r_{ij}} \right)^6 \right] \quad (2)$$

One can note that the parameters for o\_c have been modified to reproduce accurately the distance between Cr and O atoms. The cross LJ potential parameters were calculated by the Lorentz-Berthelot rules (Eq. 3)

$$\varepsilon_{ij} = \sqrt{\varepsilon_{ii}\varepsilon_{jj}} \quad \text{and} \quad \sigma_{ij} = \left( \frac{\sigma_{ii} + \sigma_{jj}}{2} \right) \quad (3)$$

**Table S2** Force field parameters for the intramolecular and non-bonded interactions of the organic moiety.

| <i>Bond potential</i>          |                                                      |                                            |              |
|--------------------------------|------------------------------------------------------|--------------------------------------------|--------------|
| Bond Type                      | $k_{ij}$ (kJ·mol <sup>-1</sup> ·Å <sup>-2</sup> )    | $r_0$ (Å)                                  |              |
| cg1-cg1                        | 4015.045                                             | 1.34                                       |              |
| cg1-cg2                        | 4015.045                                             | 1.34                                       |              |
| c_c-cg2                        | 2943.723                                             | 1.47                                       |              |
| c_c-o_c                        | 4516.925                                             | 1.25                                       |              |
| <i>Bending potential</i>       |                                                      |                                            |              |
| Angle type                     | $k_{ijk}$ (kJ·mol <sup>-1</sup> ·rad <sup>-2</sup> ) | $\theta_0$ (°)                             |              |
| cg1-cg2-cg1 / cg2-cg1-cg1      | 753.3034                                             | 120.0                                      |              |
| cg1-cg1-h_c / cg2-cg1-h_c      | 309.7182                                             | 120.0                                      |              |
| cg1-cg2-c_c                    | 290.3186                                             | 120.0                                      |              |
| cg2-c_c-o_c                    | 569.2484                                             | 120.0                                      |              |
| o_c-c_c-o_c                    | 114.1649                                             | 123.0                                      |              |
| <i>Torsion potential</i>       |                                                      |                                            |              |
| Dihedral type                  | $k_{ijkl}$ (kJ·mol <sup>-1</sup> )                   | N                                          | $\phi_0$ (°) |
| cg1-cg2-c_c-o_c                | 5.0000                                               | 2                                          | 180.0        |
| <i>Lennard-Jones potential</i> |                                                      |                                            |              |
| Atom type                      | $\sigma_{ii}$ (Å)                                    | $\varepsilon_{ii}$ (kJ·mol <sup>-1</sup> ) |              |
| o_c                            | 3.1200                                               | 0.2495                                     |              |
| c_c / cg1 / cg2                | 3.8068                                               | 0.2478                                     |              |
| h_c                            | 2.4483                                               | 0.1602                                     |              |

For the inorganic part, the Cr-O intramolecular and non bonded interactions were adjusted by our own starting with the parameters defined in the DREIDING force field.<sup>8</sup> In addition, the torsion term between the inorganic and the organic parts, cg2-c\_c-o\_c-Cr, were refined to reproduce the key structural features of the MIL-53(Cr) upon CO<sub>2</sub> adsorption. It has to be mentioned that in the MIL framework, the nonbonded interactions concern atoms separated by exactly three bonds usually

described as 1-4 van der Waals interactions with LJ potentials.

**Table S3** Force field parameters for the intramolecular and non-bonded interactions of the inorganic part.

| <i>Bond potential</i>          |                                                      |                                            |              |
|--------------------------------|------------------------------------------------------|--------------------------------------------|--------------|
| Bond Type                      | $k_{ij}$ (kJ·mol <sup>-1</sup> ·Å <sup>-2</sup> )    | $r_0$ (Å)                                  |              |
| Cr-o_c                         | 2928.2800                                            | 1.95                                       |              |
| Cr-μ <sub>2</sub> _o           | 2928.2800                                            | 1.95                                       |              |
| <i>Bending potential</i>       |                                                      |                                            |              |
| Angle type                     | $k_{ijk}$ (kJ·mol <sup>-1</sup> ·rad <sup>-2</sup> ) | $\theta_0$ (°)                             |              |
| c_c-o_c-Cr                     | 115.8186                                             | 136.0                                      |              |
| <i>Torsion potential</i>       |                                                      |                                            |              |
| Dihedral type                  | $k_{ijkl}$ (kJ·mol <sup>-1</sup> )                   | n                                          | $\phi_0$ (°) |
| cg2-c_c-o_c-Cr                 | 20.0000                                              | 2                                          | 180.0        |
| <i>Lennard Jones potential</i> |                                                      |                                            |              |
| Atom type                      | $\sigma_{ii}$ (Å)                                    | $\varepsilon_{ii}$ (kJ·mol <sup>-1</sup> ) |              |
| Cr                             | 2.6901                                               | 0.0627                                     |              |
| μ <sub>2</sub> _o              | 3.1200                                               | 0.2495                                     |              |
| h_o                            | 0.0000                                               | 0.0000                                     |              |

### 3. Flexible force field used for CO<sub>2</sub> molecule

CO<sub>2</sub> molecule was described by the flexible EPM2 potential as reported by Harris and Yung,<sup>9</sup> where all the three atoms were treated as the LJ interaction sites with the partial charges centered at each atom ( $q_C = 0.6512 e$ ,  $q_O = -0.3256 e$ ). In this model, the C–O bond length is fixed at 1.149 Å, and the O–C–O bond angle is described by an harmonic bending potential shown in Eq. 1. The corresponding potential parameters are given in Table S4. The Lorentz-Berthelot mixing rules were applied to describe the LJ interactions between the CO<sub>2</sub> molecules and the framework atoms of the MIL-53(Cr) except for the interaction between the oxygen atoms of the CO<sub>2</sub> molecule and the o\_c of the MIL-53(Cr) framework where the LJ parameters have been adjusted by our own to capture the re-opening of the structure at high concentration of CO<sub>2</sub>. The Jorgensen mixing rules (Eq. 4) were used to describe the LJ interactions between the CO<sub>2</sub> molecules, as required by the EPM2 potential.<sup>9</sup>

$$\epsilon_{ij} = \sqrt{\epsilon_{ii}\epsilon_{jj}}, \quad \sigma_{ij} = \sqrt{\sigma_{ii}\sigma_{jj}} \quad (4)$$

**Table S4** Intramolecular and non-bonded potential parameters used for CO<sub>2</sub>. The LJ parameters for the CO<sub>2</sub>/o\_c interactions are also reported.

| <i>Bending potential</i>       |                                                      |                                         |
|--------------------------------|------------------------------------------------------|-----------------------------------------|
| Angle type                     | $k_{ijk}$ (kJ·mol <sup>-1</sup> ·rad <sup>-2</sup> ) | $\theta_0$ (°)                          |
| o-c-o                          | 1236.0                                               | 180.0                                   |
| <i>Lennard Jones potential</i> |                                                      |                                         |
| Atom type                      | $\sigma_{ii}$ (Å)                                    | $\epsilon_{ii}$ (kJ·mol <sup>-1</sup> ) |
| c_CO <sub>2</sub>              | 2.7570                                               | 0.2339                                  |
| o_CO <sub>2</sub>              | 3.0330                                               | 0.6694                                  |
| o_CO <sub>2</sub> – o_c        | 3.0765                                               | 0.7087                                  |

#### 4. Calculation method for the order parameter

The order parameter  $S$  was extracted from the analysis of the whole MD simulation runs. In this work,  $S$  was calculated using eq 5,

$$S = \frac{3}{2} \left\langle \cos^2 \theta_i - \frac{1}{3} \right\rangle \quad (5)$$

where  $\theta_i$  is the angle between the long axis of molecule  $i$  (the directional unit vector) and the mean orientation (the director). In general, this director cannot be found by a simple averaging method, but is always the average of the largest eigenvalue of the ordering  $Q_{\alpha\beta}$  tensor<sup>10</sup> which corresponds to the components of the unit vectors along the principal axis of the molecules (Our simulations showed that all the flexible CO<sub>2</sub> molecules almost remain in a linear shape).  $Q_{\alpha\beta}$  was calculated by,

$$Q_{\varepsilon\beta} = \frac{3}{2N} \left( \sum_{i=1}^N e_{i\alpha} e_{i\beta} - \frac{1}{3} \delta_{\alpha\beta} \right) \quad (6)$$

where  $N$  is the total number of adsorbed molecules,  $e_i$  is the unit vector of the molecule  $i$ , and  $\delta_{\alpha\beta}$  is the delta of Kronecker ( $\delta_{\alpha\beta}=1$  if  $\alpha=\beta$  or 0 if else). The order parameter  $S$  is specifically used to characterize the degree of the orientational order, and its value can vary from 0 (fully orientationally disordered fluid) to 1 (perfectly oriented system).

#### 5. Radial distribution functions

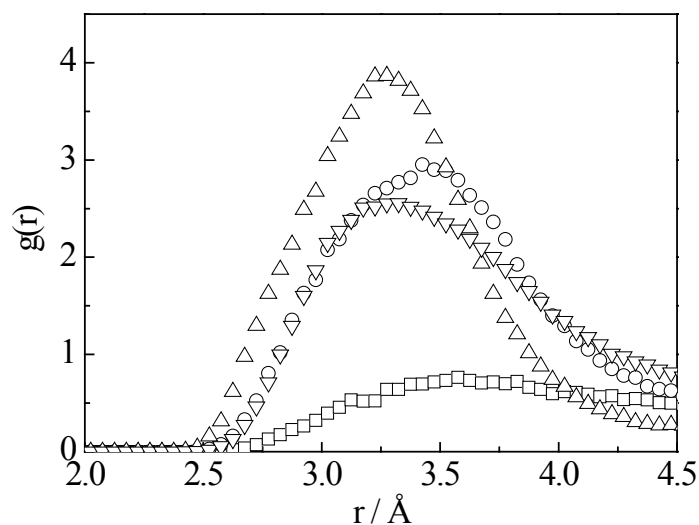

**Fig. S2** Radial distribution functions (RDFs) between the C atoms of CO<sub>2</sub> and O atoms of the  $\mu_2$ -OH

in the MIL-53(Cr) for a loading of 1 CO<sub>2</sub>/u.c at: 0.1 MPa (square symbols), 20 MPa (circle symbols) and 300 MPa (up triangle symbols) and for 3 CO<sub>2</sub>/u.c. at 0.1 MPa (down triangle symbols).

## 6. Cif files of the simulated structures

The structures of MIL-53(Cr) at 53.5 MPa and 300 MPa as well as of MIL-53(Cr) with 1 CO<sub>2</sub>/u.c. under the applied pressure of 20 MPa and 300 MPa are provided as cif files with the labels: MIL-53(Cr)-NP53.5MPa, MIL-53(Cr)-NP300MPa, MIL-53(Cr)with1CO2uc-NP20MPa, and MIL-53(Cr)with1CO2uc-NP300MPa respectively.



## 7. Summary of the Bulk Modulus for different MOFs recently reported in the literature.

**Table S5** Bulk Modulus of some MOFs

| Structure                    | Bulk modulus (GPa) | Temperature (K) | Method     | Reference |
|------------------------------|--------------------|-----------------|------------|-----------|
| MIL-53(Cr) <sup>a</sup>      | ~1.8               | 300             | Simulation | Our work  |
|                              | ~2.0               | ~300            | Experiment | 11        |
| MOF-5                        | ~17.02             | 0               | Simulation | 12        |
|                              | ~18.2              | 0               | Simulation | 13        |
|                              | ~18.5              | 0               | Simulation | 14        |
|                              | ~16.3              | 0               | Simulation | 15        |
|                              | ~20.0              | 0               | Simulation | 16        |
|                              | ~4.0               | 300             | Simulation | 16        |
|                              | ~14.4              | 0               | Simulation | 17        |
|                              | ~15.34             | 0               | Simulation | 18        |
|                              | ~16.66             | 300             | Simulation | 19        |
| IRMOF-8 (MOF-C10)            | ~11.28             | 300             | Simulation | 19        |
| IRMOF-14 (MOF-C16)           | ~10.05             | 300             | Simulation | 19        |
| MOF-C22                      | ~6.88              | 300             | Simulation | 19        |
| MOF-C30                      | ~4.11              | 300             | Simulation | 19        |
| MOF-177                      | ~10.10             | 0               | Simulation | 18        |
| DUT-6                        | ~10.73             | 0               | Simulation | 18        |
| MOF-14 (interpenetrated)     | ~14.8              | 0               | Simulation | 20        |
| MOF-14 (non-interpenetrated) | ~5.5               | 0               | Simulation | 20        |
| DUT-34                       | ~9.1               | 0               | Simulation | 20        |
| DUT-23                       | ~13.2              | 0               | Simulation | 20        |
| HKUST-1                      | ~30.7              | ~300            | Experiment | 21        |
|                              | ~25                | ~300            | Simulation | 22        |
|                              | ~35.2              | 300             | Simulation | 23        |
| Zn(Im) <sub>2</sub>          | ~14                | ~300            | Experiment | 24        |
| LiB(Im) <sub>4</sub>         | ~16.6              | ~300            | Experiment | 25        |
| ZIF-8                        | ~6.5               | ~300            | Experiment | 26        |

<sup>a</sup>Large-pore form

## References

1. K. Barthelet, J. Marrot, D. Riou and G. Férey, *Angew. Chem., Int. Ed.*, 2002, **41**, 281.
2. N.A. Ramsahye, G. Maurin, S. Bourrelly, P.L. Llewellyn, T. Loiseau and G. Férey, *Phys. Chem. Chem. Phys.*, 2007, **9**, 1059.
3. Accelrys Inc., San Diego, 1999.
4. J.P. Perdew and Y. Wang, *Phys. Rev. B*, 1992, **45**, 13244.

5. W.J. Hehre, J.H. Ditchfield and J.A. Pople, *J. Chem. Phys.*, 1972, **56**, 2257.
6. A. Ghoufi, G. Férey and G. Maurin, in preparation.
7. P. Dauber-Osguthorpe, V.A Roberts, D. J. Dauber-Osguthorpe, J. Wolf, M. Genest, A.T. Hagler and *Proteins*, 1988, **4**, 31.
8. S. L. Mayo, B. D. Olafson and W. A. Goddard, *J. Phys. Chem.*, 1990, **94**, 8897.
9. J. G. Harris and K. H. Yung, *J. Phys. Chem.*, 1995, **99**, 12021.
10. C. Zannoni, in *The Molecular Physics of Liquid Crystals*, ed. G. R. Luckhurst and G. W. Gray, 1979, pp. 191.
11. A. V. Neimark, F.-X. Coudert, C. Triguero, A. Boutin, A. H. Fuchs, I. Beurroies and R. Denoyel, *Langmuir*, 2011, **27**, 4734.
12. M. Mattesini, J. M. Soler and F. Yndurain, *Phys. Rev. B*, 2006, **73**, 094111.
13. W. Zhou and T. Yildirim, *Phys. Rev. B*, 2006, **74**, 180301.
14. A. Samanta, T. Furuta and J. Li, *J. Chem. Phys.*, 2006, **125**, 084714.
15. D. F. Bahr, J. A. Reid, W. M. Mook, C. A. Bauer, R. Stumpf, A. J. Skulan, N. R. Moody, B. A. Simmons, M. M. Shindel and M. D. Allendorf, *Phys. Rev. B*, 2007, **76**, 184106.
16. J. A. Greathouse and M. D. Allendorf, *J. Phys. Chem. C*, 2008, **112**, 5795.
17. M. Tafipolsky and R. Schmid, *J. Phys. Chem. B*, 2009, **113**, 1341.
18. B. Lukose, B. Supronowicz, P. St. Petkov, J. Frenzel, A. B. Kuc, G. Seifert, G. N. Vayssilov and T. Heine, *Mater. Sci.*, submitted.
19. S. S. Han and W. A. Goddard, *J. Phys. Chem. C*, 2007, **111**, 15185.
20. N. Klein, I. Senkovska, I. A. Baburin, R. Grünker, U. Stoeck, M. Schlichtenmayer, B. Streppel, U. Mueller, S. Leoni, M. Hirscher and S. Kaskel, *Chem. Eur. J.*, 2011, **17**, 13007.
21. K. W. Chapman, G. J. Halder and P. J. Chupas, *J. Am. Chem. Soc.*, 2008, **130**, 10524.
22. M. Tafipolsky, S. Amirjalayer and R. Schmid, *J. Phys. Chem. C*, 2010, **114**, 14402.
23. L. Zhao, Q. Yang, Q. Ma, C. Zhong, J. Mi and D. Liu, *J. Mol. Model.*, 2011, **17**, 227.
24. E. C. Spencer, R. J. Angel, N. L. Ross, B. E. Hanson and J. A. K. Howard, *J. Am. Chem. Soc.*, 2009, **131**, 4022.
25. T. D. Bennett, J. C. Tan, S. A. Moggach, R. Galvelis, C. Mellot-Draznieks, B. A. Reisner, A. Thirumurugan, D. R. Allan and A. K. Cheetham, *Chem. Eur. J.*, 2010, **16**, 10684.
26. K. W. Chapman, G. J. Halder and P. J. Chupas, *J. Am. Chem. Soc.*, 2009, **131**, 17546.
