# Supplementary material for: Planes y Directrices
Source: Royal Society of Chemistry journal article supplement (doi:10.1039/c2dt12002j), 2009-01-01
Supplement: c2dt12002j_2.pdf [file c2dt12002j_2.pdf]

MI L-53\_Cr\_-NP53. 5MPa

data\_MIL-53(Cr)-NP53. 5MPa

\_audit\_creation\_date 2011-10-20  
\_audit\_creation\_method 'Materials Studi o'  
\_symmetry\_space\_group\_name\_H-M 'P1'  
\_symmetry\_Int\_Tables\_number 1  
\_symmetry\_cell\_setting triclinic

loop\_

\_symmetry\_equiv\_pos\_as\_xyz

x, y, z

\_cell\_length\_a 19.2730  
\_cell\_length\_b 7.9140  
\_cell\_length\_c 6.5830  
\_cell\_angle\_alpha 90.0000  
\_cell\_angle\_beta 95.0000  
\_cell\_angle\_gamma 90.0000

loop\_

\_atom\_site\_label

\_atom\_site\_type\_symbol

\_atom\_site\_fract\_x

\_atom\_site\_fract\_y

\_atom\_site\_fract\_z

\_atom\_site\_U\_iso\_or\_equiv

\_atom\_site\_adp\_type

\_atom\_site\_occupancy

|     |   |         |         |         |         |       |      |
|-----|---|---------|---------|---------|---------|-------|------|
| O1  | O | 0.91658 | 0.37828 | 0.84551 | 0.04000 | Ui so | 1.00 |
| O2  | O | 0.06458 | 0.67099 | 0.44100 | 0.04000 | Ui so | 1.00 |
| C3  | C | 0.79817 | 0.21753 | 0.38226 | 0.04000 | Ui so | 1.00 |
| C4  | C | 0.22677 | 0.70150 | 0.29072 | 0.04000 | Ui so | 1.00 |
| C5  | C | 0.82192 | 0.27388 | 0.58963 | 0.04000 | Ui so | 1.00 |
| C6  | C | 0.89230 | 0.35218 | 0.65945 | 0.04000 | Ui so | 1.00 |
| H7  | H | 0.83349 | 0.18320 | 0.29927 | 0.04000 | Ui so | 1.00 |
| H8  | H | 0.20994 | 0.67552 | 0.13403 | 0.04000 | Ui so | 1.00 |
| O9  | O | 0.41658 | 0.87828 | 0.84551 | 0.04000 | Ui so | 1.00 |
| O10 | O | 0.56458 | 0.17099 | 0.44100 | 0.04000 | Ui so | 1.00 |
| C11 | C | 0.29817 | 0.71753 | 0.38226 | 0.04000 | Ui so | 1.00 |
| C12 | C | 0.72677 | 0.20150 | 0.29072 | 0.04000 | Ui so | 1.00 |
| C13 | C | 0.32192 | 0.77388 | 0.58963 | 0.04000 | Ui so | 1.00 |
| C14 | C | 0.39230 | 0.85218 | 0.65945 | 0.04000 | Ui so | 1.00 |
| H15 | H | 0.33349 | 0.68320 | 0.29927 | 0.04000 | Ui so | 1.00 |
| H16 | H | 0.70994 | 0.17552 | 0.13403 | 0.04000 | Ui so | 1.00 |
| O17 | O | 0.08342 | 0.37828 | 0.65449 | 0.04000 | Ui so | 1.00 |
| O18 | O | 0.93542 | 0.67099 | 0.05900 | 0.04000 | Ui so | 1.00 |
| C19 | C | 0.20183 | 0.21753 | 0.11774 | 0.04000 | Ui so | 1.00 |
| C20 | C | 0.77323 | 0.70150 | 0.20928 | 0.04000 | Ui so | 1.00 |
| C21 | C | 0.17808 | 0.27388 | 0.91037 | 0.04000 | Ui so | 1.00 |
| C22 | C | 0.10770 | 0.35218 | 0.84055 | 0.04000 | Ui so | 1.00 |
| H23 | H | 0.16651 | 0.18320 | 0.20073 | 0.04000 | Ui so | 1.00 |
| H24 | H | 0.79006 | 0.67552 | 0.36597 | 0.04000 | Ui so | 1.00 |
| O25 | O | 0.58342 | 0.87828 | 0.65449 | 0.04000 | Ui so | 1.00 |
| O26 | O | 0.43542 | 0.17099 | 0.05900 | 0.04000 | Ui so | 1.00 |
| C27 | C | 0.70183 | 0.71753 | 0.11774 | 0.04000 | Ui so | 1.00 |
| C28 | C | 0.27323 | 0.20150 | 0.20928 | 0.04000 | Ui so | 1.00 |
| C29 | C | 0.67808 | 0.77388 | 0.91037 | 0.04000 | Ui so | 1.00 |
| C30 | C | 0.60770 | 0.85218 | 0.84055 | 0.04000 | Ui so | 1.00 |
| H31 | H | 0.66651 | 0.68320 | 0.20073 | 0.04000 | Ui so | 1.00 |
| H32 | H | 0.29006 | 0.17552 | 0.36597 | 0.04000 | Ui so | 1.00 |
| O33 | O | 0.08342 | 0.62172 | 0.15449 | 0.04000 | Ui so | 1.00 |
| O34 | O | 0.93542 | 0.32901 | 0.55900 | 0.04000 | Ui so | 1.00 |
| C35 | C | 0.20183 | 0.78247 | 0.61774 | 0.04000 | Ui so | 1.00 |
| C36 | C | 0.77323 | 0.29850 | 0.70928 | 0.04000 | Ui so | 1.00 |
| C37 | C | 0.17808 | 0.72612 | 0.41037 | 0.04000 | Ui so | 1.00 |
| C38 | C | 0.10770 | 0.64782 | 0.34055 | 0.04000 | Ui so | 1.00 |
| H39 | H | 0.16651 | 0.81680 | 0.70073 | 0.04000 | Ui so | 1.00 |
| H40 | H | 0.79006 | 0.32448 | 0.86597 | 0.04000 | Ui so | 1.00 |
| O41 | O | 0.58342 | 0.12172 | 0.15449 | 0.04000 | Ui so | 1.00 |
| O42 | O | 0.43542 | 0.82901 | 0.55900 | 0.04000 | Ui so | 1.00 |
| C43 | C | 0.70183 | 0.28247 | 0.61774 | 0.04000 | Ui so | 1.00 |
| C44 | C | 0.27323 | 0.79850 | 0.70928 | 0.04000 | Ui so | 1.00 |

MI L-53\_Cr\_-NP53. 5MPa

|      |    |          |         |         |         |       |      |
|------|----|----------|---------|---------|---------|-------|------|
| C45  | C  | 0.67808  | 0.22612 | 0.41037 | 0.04000 | Ui so | 1.00 |
| C46  | C  | 0.60770  | 0.14782 | 0.34055 | 0.04000 | Ui so | 1.00 |
| H47  | H  | 0.66651  | 0.31680 | 0.70073 | 0.04000 | Ui so | 1.00 |
| H48  | H  | 0.29006  | 0.82448 | 0.86597 | 0.04000 | Ui so | 1.00 |
| O49  | O  | 0.91658  | 0.62172 | 0.34551 | 0.04000 | Ui so | 1.00 |
| O50  | O  | 0.06458  | 0.32901 | 0.94100 | 0.04000 | Ui so | 1.00 |
| C51  | C  | 0.79817  | 0.78247 | 0.88226 | 0.04000 | Ui so | 1.00 |
| C52  | C  | 0.22677  | 0.29850 | 0.79072 | 0.04000 | Ui so | 1.00 |
| C53  | C  | 0.82192  | 0.72612 | 0.08963 | 0.04000 | Ui so | 1.00 |
| C54  | C  | 0.89230  | 0.64782 | 0.15945 | 0.04000 | Ui so | 1.00 |
| H55  | H  | 0.83349  | 0.81680 | 0.79927 | 0.04000 | Ui so | 1.00 |
| H56  | H  | 0.20994  | 0.32448 | 0.63403 | 0.04000 | Ui so | 1.00 |
| O57  | O  | 0.41658  | 0.12172 | 0.34551 | 0.04000 | Ui so | 1.00 |
| O58  | O  | 0.56458  | 0.82901 | 0.94100 | 0.04000 | Ui so | 1.00 |
| C59  | C  | 0.29817  | 0.28247 | 0.88226 | 0.04000 | Ui so | 1.00 |
| C60  | C  | 0.72677  | 0.79850 | 0.79072 | 0.04000 | Ui so | 1.00 |
| C61  | C  | 0.32192  | 0.22612 | 0.08963 | 0.04000 | Ui so | 1.00 |
| C62  | C  | 0.39230  | 0.14782 | 0.15945 | 0.04000 | Ui so | 1.00 |
| H63  | H  | 0.33349  | 0.31680 | 0.79927 | 0.04000 | Ui so | 1.00 |
| H64  | H  | 0.70994  | 0.82448 | 0.63403 | 0.04000 | Ui so | 1.00 |
| Cr65 | Cr | -0.00000 | 0.50000 | 1.00000 | 0.04000 | Ui so | 1.00 |
| Cr66 | Cr | 0.50000  | 1.00000 | 1.00000 | 0.04000 | Ui so | 1.00 |
| Cr67 | Cr | -0.00000 | 0.50000 | 0.50000 | 0.04000 | Ui so | 1.00 |
| Cr68 | Cr | 0.50000  | 1.00000 | 0.50000 | 0.04000 | Ui so | 1.00 |
| O69  | O  | 0.00000  | 0.64306 | 0.75000 | 0.04000 | Ui so | 1.00 |
| H70  | H  | 0.00000  | 0.75023 | 0.75000 | 0.04000 | Ui so | 1.00 |
| O71  | O  | 0.50000  | 0.14306 | 0.75000 | 0.04000 | Ui so | 1.00 |
| H72  | H  | 0.50000  | 0.25023 | 0.75000 | 0.04000 | Ui so | 1.00 |
| O73  | O  | 0.00000  | 0.35694 | 0.25000 | 0.04000 | Ui so | 1.00 |
| H74  | H  | 0.00000  | 0.24977 | 0.25000 | 0.04000 | Ui so | 1.00 |
| O75  | O  | 0.50000  | 0.85694 | 0.25000 | 0.04000 | Ui so | 1.00 |
| H76  | H  | 0.50000  | 0.74977 | 0.25000 | 0.04000 | Ui so | 1.00 |

loop\_

\_geom\_bond\_atom\_site\_label\_1

\_geom\_bond\_atom\_site\_label\_2

\_geom\_bond\_distance

\_geom\_bond\_site\_symmetry\_2

\_ccdc\_geom\_bond\_type

|     |      |       |       |   |
|-----|------|-------|-------|---|
| 01  | C6   | 1.289 | .     | S |
| 01  | Cr65 | 2.064 | 1_655 | S |
| 02  | Cr67 | 1.901 | .     | S |
| 02  | C38  | 1.121 | .     | S |
| C3  | C5   | 1.471 | .     | S |
| C3  | H7   | 0.949 | .     | S |
| C3  | C12  | 1.459 | .     | S |
| C4  | C11  | 1.459 | .     | S |
| C4  | C37  | 1.291 | .     | S |
| C4  | H8   | 1.074 | .     | S |
| C5  | C36  | 1.291 | .     | S |
| C5  | C6   | 1.525 | .     | S |
| C6  | O34  | 1.121 | .     | S |
| O9  | Cr66 | 2.064 | .     | S |
| O9  | C14  | 1.289 | .     | S |
| O10 | C46  | 1.121 | .     | S |
| O10 | Cr68 | 1.901 | 1_545 | S |
| C11 | C13  | 1.471 | .     | S |
| C11 | H15  | 0.949 | .     | S |
| C12 | C45  | 1.291 | .     | S |
| C12 | H16  | 1.074 | .     | S |
| C13 | C44  | 1.291 | .     | S |
| C13 | C14  | 1.525 | .     | S |
| C14 | O42  | 1.121 | .     | S |
| O17 | Cr67 | 2.064 | .     | S |
| O17 | C22  | 1.289 | .     | S |
| O18 | C54  | 1.121 | .     | S |
| O18 | Cr65 | 1.901 | 1_654 | S |
| C19 | H23  | 0.949 | .     | S |
| C19 | C28  | 1.459 | .     | S |

MI L-53\_Cr\_-NP53. 5MPa

|      |      |       |       |   |
|------|------|-------|-------|---|
| C19  | C21  | 1.471 | 1_554 | S |
| C20  | C27  | 1.459 | .     | S |
| C20  | C53  | 1.291 | .     | S |
| C20  | H24  | 1.074 | .     | S |
| C21  | C52  | 1.291 | .     | S |
| C21  | C22  | 1.525 | .     | S |
| C21  | C19  | 1.471 | 1_556 | S |
| C22  | O50  | 1.121 | .     | S |
| O25  | Cr68 | 2.064 | .     | S |
| O25  | C30  | 1.289 | .     | S |
| O26  | C62  | 1.121 | .     | S |
| O26  | Cr66 | 1.901 | 1_544 | S |
| C27  | H31  | 0.949 | .     | S |
| C27  | C29  | 1.471 | 1_554 | S |
| C28  | C61  | 1.291 | .     | S |
| C28  | H32  | 1.074 | .     | S |
| C29  | C60  | 1.291 | .     | S |
| C29  | C30  | 1.525 | .     | S |
| C29  | C27  | 1.471 | 1_556 | S |
| C30  | O58  | 1.121 | .     | S |
| O33  | C38  | 1.289 | .     | S |
| O33  | Cr65 | 2.064 | 1_554 | S |
| O34  | Cr67 | 1.901 | 1_655 | S |
| C35  | C37  | 1.471 | .     | S |
| C35  | H39  | 0.949 | .     | S |
| C35  | C44  | 1.459 | .     | S |
| C36  | C43  | 1.459 | .     | S |
| C36  | H40  | 1.074 | .     | S |
| C37  | C38  | 1.525 | .     | S |
| O41  | C46  | 1.289 | .     | S |
| O41  | Cr66 | 2.064 | 1_544 | S |
| O42  | Cr68 | 1.901 | .     | S |
| C43  | C45  | 1.471 | .     | S |
| C43  | H47  | 0.949 | .     | S |
| C44  | H48  | 1.074 | .     | S |
| C45  | C46  | 1.525 | .     | S |
| O49  | C54  | 1.289 | .     | S |
| O49  | Cr67 | 2.064 | 1_655 | S |
| O50  | Cr65 | 1.901 | .     | S |
| C51  | H55  | 0.949 | .     | S |
| C51  | C60  | 1.459 | .     | S |
| C51  | C53  | 1.471 | 1_556 | S |
| C52  | C59  | 1.459 | .     | S |
| C52  | H56  | 1.074 | .     | S |
| C53  | C54  | 1.525 | .     | S |
| C53  | C51  | 1.471 | 1_554 | S |
| O57  | C62  | 1.289 | .     | S |
| O57  | Cr68 | 2.064 | 1_545 | S |
| O58  | Cr66 | 1.901 | .     | S |
| C59  | H63  | 0.949 | .     | S |
| C59  | C61  | 1.471 | 1_556 | S |
| C60  | H64  | 1.074 | .     | S |
| C61  | C62  | 1.525 | .     | S |
| C61  | C59  | 1.471 | 1_554 | S |
| Cr65 | O69  | 1.998 | .     | S |
| Cr65 | O1   | 2.064 | 1_455 | S |
| Cr65 | O18  | 1.901 | 1_456 | S |
| Cr65 | O33  | 2.064 | 1_556 | S |
| Cr65 | O73  | 1.998 | 1_556 | S |
| Cr66 | O26  | 1.901 | 1_566 | S |
| Cr66 | O41  | 2.064 | 1_566 | S |
| Cr66 | O71  | 1.998 | 1_565 | S |
| Cr66 | O75  | 1.998 | 1_556 | S |
| Cr67 | O69  | 1.998 | .     | S |
| Cr67 | O73  | 1.998 | .     | S |
| Cr67 | O34  | 1.901 | 1_455 | S |
| Cr67 | O49  | 2.064 | 1_455 | S |
| Cr68 | O75  | 1.998 | .     | S |

|      |      |       |       | MI L-53_Cr_-NP53. 5MPa |
|------|------|-------|-------|------------------------|
| Cr68 | 010  | 1.901 | 1_565 | S                      |
| Cr68 | 057  | 2.064 | 1_565 | S                      |
| Cr68 | 071  | 1.998 | 1_565 | S                      |
| 069  | H70  | 0.848 | .     | S                      |
| 071  | H72  | 0.848 | .     | S                      |
| 071  | Cr66 | 1.998 | 1_545 | S                      |
| 071  | Cr68 | 1.998 | 1_545 | S                      |
| 073  | H74  | 0.848 | .     | S                      |
| 073  | Cr65 | 1.998 | 1_554 | S                      |
| 075  | H76  | 0.848 | .     | S                      |
| 075  | Cr66 | 1.998 | 1_554 | S                      |
