# Supplementary material for: Planes y Directrices
Source: Royal Society of Chemistry journal article supplement (doi:10.1039/c2dt12002j), 2009-01-01
Supplement: c2dt12002j_3.pdf [file c2dt12002j_3.pdf]

MI L-53\_Cr\_-NP300MPa

data\_MIL-53(Cr)-NP300MPa  
\_audit\_creation\_date 2011-10-20  
\_audit\_creation\_method 'Materials Studio'  
\_symmetry\_space\_group\_name\_H-M 'P1'  
\_symmetry\_Int\_Tables\_number 1  
\_symmetry\_cell\_setting triclinic  
loop\_  
\_symmetry\_equiv\_pos\_as\_xyz  
x, y, z  
\_cell\_length\_a 19.3240  
\_cell\_length\_b 7.3970  
\_cell\_length\_c 6.5560  
\_cell\_angle\_alpha 90.0000  
\_cell\_angle\_beta 96.2300  
\_cell\_angle\_gamma 90.0000  
loop\_  
\_atom\_site\_label  
\_atom\_site\_type\_symbol  
\_atom\_site\_fract\_x  
\_atom\_site\_fract\_y  
\_atom\_site\_fract\_z  
\_atom\_site\_U\_iso\_or\_equiv  
\_atom\_site\_adp\_type  
\_atom\_site\_occupancy  
O1 O 0.93756 0.68687 0.56798 0.04000 Uiso 1.00  
O2 O 0.08454 0.37420 0.14954 0.04000 Uiso 1.00  
C3 C 0.77164 0.70052 0.71042 0.04000 Uiso 1.00  
C4 C 0.20050 0.20839 0.61540 0.04000 Uiso 1.00  
C5 C 0.82180 0.73334 0.59301 0.04000 Uiso 1.00  
C6 C 0.89280 0.65477 0.66454 0.04000 Uiso 1.00  
H7 H 0.78723 0.67646 0.86935 0.04000 Uiso 1.00  
H8 H 0.16428 0.16884 0.69810 0.04000 Uiso 1.00  
O9 O 0.43756 0.18687 0.56798 0.04000 Uiso 1.00  
O10 O 0.58454 0.87420 0.14954 0.04000 Uiso 1.00  
C11 C 0.27164 0.20052 0.71042 0.04000 Uiso 1.00  
C12 C 0.70050 0.70839 0.61540 0.04000 Uiso 1.00  
C13 C 0.32180 0.23334 0.59301 0.04000 Uiso 1.00  
C14 C 0.39280 0.15477 0.66454 0.04000 Uiso 1.00  
H15 H 0.28723 0.17646 0.86935 0.04000 Uiso 1.00  
H16 H 0.66428 0.66884 0.69810 0.04000 Uiso 1.00  
O17 O 0.06244 0.68687 0.93202 0.04000 Uiso 1.00  
O18 O 0.91546 0.37420 0.35046 0.04000 Uiso 1.00  
C19 C 0.22836 0.70052 0.78958 0.04000 Uiso 1.00  
C20 C 0.79950 0.20839 0.88460 0.04000 Uiso 1.00  
C21 C 0.17820 0.73334 0.90699 0.04000 Uiso 1.00  
C22 C 0.10720 0.65477 0.83546 0.04000 Uiso 1.00  
H23 H 0.21277 0.67646 0.63065 0.04000 Uiso 1.00  
H24 H 0.83572 0.16884 0.80190 0.04000 Uiso 1.00  
O25 O 0.56244 0.18687 0.93202 0.04000 Uiso 1.00  
O26 O 0.41546 0.87420 0.35046 0.04000 Uiso 1.00  
C27 C 0.72836 0.20052 0.78958 0.04000 Uiso 1.00  
C28 C 0.29950 0.70839 0.88460 0.04000 Uiso 1.00  
C29 C 0.67820 0.23334 0.90699 0.04000 Uiso 1.00  
C30 C 0.60720 0.15477 0.83546 0.04000 Uiso 1.00  
H31 H 0.71277 0.17646 0.63065 0.04000 Uiso 1.00  
H32 H 0.33572 0.66884 0.80190 0.04000 Uiso 1.00  
O33 O 0.06244 0.31313 0.43202 0.04000 Uiso 1.00  
O34 O 0.91546 0.62580 0.85046 0.04000 Uiso 1.00  
C35 C 0.22836 0.29948 0.28958 0.04000 Uiso 1.00  
C36 C 0.79950 0.79161 0.38460 0.04000 Uiso 1.00  
C37 C 0.17820 0.26666 0.40699 0.04000 Uiso 1.00  
C38 C 0.10720 0.34523 0.33546 0.04000 Uiso 1.00  
H39 H 0.21277 0.32354 0.13065 0.04000 Uiso 1.00  
H40 H 0.83572 0.83116 0.30190 0.04000 Uiso 1.00  
O41 O 0.56244 0.81313 0.43202 0.04000 Uiso 1.00  
O42 O 0.41546 0.12580 0.85046 0.04000 Uiso 1.00  
C43 C 0.72836 0.79948 0.28958 0.04000 Uiso 1.00  
C44 C 0.29950 0.29161 0.38460 0.04000 Uiso 1.00

MI L-53\_Cr\_-NP300MPa

|      |    |         |         |         |         |       |      |
|------|----|---------|---------|---------|---------|-------|------|
| C45  | C  | 0.67820 | 0.76666 | 0.40699 | 0.04000 | Ui so | 1.00 |
| C46  | C  | 0.60720 | 0.84523 | 0.33546 | 0.04000 | Ui so | 1.00 |
| H47  | H  | 0.71277 | 0.82354 | 0.13065 | 0.04000 | Ui so | 1.00 |
| H48  | H  | 0.33572 | 0.33116 | 0.30190 | 0.04000 | Ui so | 1.00 |
| O49  | O  | 0.93756 | 0.31313 | 0.06798 | 0.04000 | Ui so | 1.00 |
| O50  | O  | 0.08454 | 0.62580 | 0.64954 | 0.04000 | Ui so | 1.00 |
| C51  | C  | 0.77164 | 0.29948 | 0.21042 | 0.04000 | Ui so | 1.00 |
| C52  | C  | 0.20050 | 0.79161 | 0.11540 | 0.04000 | Ui so | 1.00 |
| C53  | C  | 0.82180 | 0.26666 | 0.09301 | 0.04000 | Ui so | 1.00 |
| C54  | C  | 0.89280 | 0.34523 | 0.16454 | 0.04000 | Ui so | 1.00 |
| H55  | H  | 0.78723 | 0.32354 | 0.36935 | 0.04000 | Ui so | 1.00 |
| H56  | H  | 0.16428 | 0.83116 | 0.19810 | 0.04000 | Ui so | 1.00 |
| O57  | O  | 0.43756 | 0.81313 | 0.06798 | 0.04000 | Ui so | 1.00 |
| O58  | O  | 0.58454 | 0.12580 | 0.64954 | 0.04000 | Ui so | 1.00 |
| C59  | C  | 0.27164 | 0.79948 | 0.21042 | 0.04000 | Ui so | 1.00 |
| C60  | C  | 0.70050 | 0.29161 | 0.11540 | 0.04000 | Ui so | 1.00 |
| C61  | C  | 0.32180 | 0.76666 | 0.09301 | 0.04000 | Ui so | 1.00 |
| C62  | C  | 0.39280 | 0.84523 | 0.16454 | 0.04000 | Ui so | 1.00 |
| H63  | H  | 0.28723 | 0.82354 | 0.36935 | 0.04000 | Ui so | 1.00 |
| H64  | H  | 0.66428 | 0.33116 | 0.19810 | 0.04000 | Ui so | 1.00 |
| Cr65 | Cr | 0.00000 | 0.50000 | 0.50000 | 0.04000 | Ui so | 1.00 |
| Cr66 | Cr | 0.50000 | 1.00000 | 0.50000 | 0.04000 | Ui so | 1.00 |
| Cr67 | Cr | 0.00000 | 0.50000 | 1.00000 | 0.04000 | Ui so | 1.00 |
| Cr68 | Cr | 0.50000 | 1.00000 | 1.00000 | 0.04000 | Ui so | 1.00 |
| O69  | O  | 0.00000 | 0.34554 | 0.75000 | 0.04000 | Ui so | 1.00 |
| H70  | H  | 0.00000 | 0.22962 | 0.75000 | 0.04000 | Ui so | 1.00 |
| O71  | O  | 0.50000 | 0.84554 | 0.75000 | 0.04000 | Ui so | 1.00 |
| H72  | H  | 0.50000 | 0.72962 | 0.75000 | 0.04000 | Ui so | 1.00 |
| O73  | O  | 0.00000 | 0.65446 | 0.25000 | 0.04000 | Ui so | 1.00 |
| H74  | H  | 0.00000 | 0.77038 | 0.25000 | 0.04000 | Ui so | 1.00 |
| O75  | O  | 0.50000 | 0.15446 | 0.25000 | 0.04000 | Ui so | 1.00 |
| H76  | H  | 0.50000 | 0.27038 | 0.25000 | 0.04000 | Ui so | 1.00 |

loop\_

\_geom\_bond\_atom\_site\_label\_1

\_geom\_bond\_atom\_site\_label\_2

\_geom\_bond\_distance

\_geom\_bond\_site\_symmetry\_2

\_ccdc\_geom\_bond\_type

|     |      |       |       |   |
|-----|------|-------|-------|---|
| 01  | C6   | 1.151 | .     | S |
| 01  | Cr65 | 1.919 | 1_655 | S |
| 02  | C38  | 1.268 | .     | S |
| 02  | Cr67 | 2.037 | 1_554 | S |
| C3  | H7   | 1.068 | .     | S |
| C3  | C12  | 1.448 | .     | S |
| C3  | C5   | 1.324 | .     | S |
| C4  | C11  | 1.448 | .     | S |
| C4  | C37  | 1.453 | .     | S |
| C4  | H8   | 0.976 | .     | S |
| C5  | C36  | 1.453 | .     | S |
| C5  | C6   | 1.517 | .     | S |
| C6  | O34  | 1.268 | .     | S |
| O9  | C14  | 1.151 | .     | S |
| O9  | Cr66 | 1.919 | 1_545 | S |
| O10 | C46  | 1.268 | .     | S |
| O10 | Cr68 | 2.037 | 1_554 | S |
| C11 | H15  | 1.068 | .     | S |
| C11 | C13  | 1.324 | .     | S |
| C12 | C45  | 1.453 | .     | S |
| C12 | H16  | 0.976 | .     | S |
| C13 | C44  | 1.453 | .     | S |
| C13 | C14  | 1.517 | .     | S |
| C14 | O42  | 1.268 | .     | S |
| O17 | C22  | 1.151 | .     | S |
| O17 | Cr67 | 1.919 | .     | S |
| O18 | C54  | 1.268 | .     | S |
| O18 | Cr65 | 2.037 | 1_655 | S |
| C19 | H23  | 1.068 | .     | S |
| C19 | C28  | 1.448 | .     | S |

MI L-53\_Cr\_-NP300MPa

|      |      |       |       |   |
|------|------|-------|-------|---|
| C19  | C21  | 1.324 | .     | S |
| C20  | C27  | 1.448 | .     | S |
| C20  | H24  | 0.976 | .     | S |
| C20  | C53  | 1.453 | 1_556 | S |
| C21  | C22  | 1.517 | .     | S |
| C21  | C52  | 1.453 | 1_556 | S |
| C22  | O50  | 1.268 | .     | S |
| O25  | C30  | 1.151 | .     | S |
| O25  | Cr68 | 1.919 | 1_545 | S |
| O26  | Cr66 | 2.037 | .     | S |
| O26  | C62  | 1.268 | .     | S |
| C27  | H31  | 1.068 | .     | S |
| C27  | C29  | 1.324 | .     | S |
| C28  | H32  | 0.976 | .     | S |
| C28  | C61  | 1.453 | 1_556 | S |
| C29  | C30  | 1.517 | .     | S |
| C29  | C60  | 1.453 | 1_556 | S |
| C30  | O58  | 1.268 | .     | S |
| O33  | C38  | 1.151 | .     | S |
| O33  | Cr65 | 1.919 | .     | S |
| O34  | Cr67 | 2.037 | 1_655 | S |
| C35  | H39  | 1.068 | .     | S |
| C35  | C44  | 1.448 | .     | S |
| C35  | C37  | 1.324 | .     | S |
| C36  | C43  | 1.448 | .     | S |
| C36  | H40  | 0.976 | .     | S |
| C37  | C38  | 1.517 | .     | S |
| O41  | C46  | 1.151 | .     | S |
| O41  | Cr66 | 1.919 | .     | S |
| O42  | Cr68 | 2.037 | 1_545 | S |
| C43  | H47  | 1.068 | .     | S |
| C43  | C45  | 1.324 | .     | S |
| C44  | H48  | 0.976 | .     | S |
| C45  | C46  | 1.517 | .     | S |
| O49  | C54  | 1.151 | .     | S |
| O49  | Cr67 | 1.919 | 1_654 | S |
| O50  | Cr65 | 2.037 | .     | S |
| C51  | H55  | 1.068 | .     | S |
| C51  | C60  | 1.448 | .     | S |
| C51  | C53  | 1.324 | .     | S |
| C52  | C59  | 1.448 | .     | S |
| C52  | H56  | 0.976 | .     | S |
| C52  | C21  | 1.453 | 1_554 | S |
| C53  | C54  | 1.517 | .     | S |
| C53  | C20  | 1.453 | 1_554 | S |
| O57  | C62  | 1.151 | .     | S |
| O57  | Cr68 | 1.919 | 1_554 | S |
| O58  | Cr66 | 2.037 | 1_545 | S |
| C59  | H63  | 1.068 | .     | S |
| C59  | C61  | 1.324 | .     | S |
| C60  | H64  | 0.976 | .     | S |
| C60  | C29  | 1.453 | 1_554 | S |
| C61  | C62  | 1.517 | .     | S |
| C61  | C28  | 1.453 | 1_554 | S |
| Cr65 | O69  | 1.998 | .     | S |
| Cr65 | O73  | 1.998 | .     | S |
| Cr65 | O1   | 1.919 | 1_455 | S |
| Cr65 | O18  | 2.037 | 1_455 | S |
| Cr66 | O71  | 1.998 | .     | S |
| Cr66 | O9   | 1.919 | 1_565 | S |
| Cr66 | O58  | 2.037 | 1_565 | S |
| Cr66 | O75  | 1.998 | 1_565 | S |
| Cr67 | O69  | 1.998 | .     | S |
| Cr67 | O2   | 2.037 | 1_556 | S |
| Cr67 | O34  | 2.037 | 1_455 | S |
| Cr67 | O49  | 1.919 | 1_456 | S |
| Cr67 | O73  | 1.998 | 1_556 | S |
| Cr68 | O71  | 1.998 | .     | S |

|      |      |       |       | MI L-53_Cr_-NP300MPa |
|------|------|-------|-------|----------------------|
| Cr68 | 010  | 2.037 | 1_556 | S                    |
| Cr68 | 025  | 1.919 | 1_565 | S                    |
| Cr68 | 042  | 2.037 | 1_565 | S                    |
| Cr68 | 057  | 1.919 | 1_556 | S                    |
| Cr68 | 075  | 1.998 | 1_566 | S                    |
| 069  | H70  | 0.857 | .     | S                    |
| 071  | H72  | 0.857 | .     | S                    |
| 073  | H74  | 0.857 | .     | S                    |
| 073  | Cr67 | 1.998 | 1_554 | S                    |
| 075  | H76  | 0.857 | .     | S                    |
| 075  | Cr66 | 1.998 | 1_545 | S                    |
| 075  | Cr68 | 1.998 | 1_544 | S                    |
