# Supplementary material for: Planes y Directrices
Source: Royal Society of Chemistry journal article supplement (doi:10.1039/c2dt12002j), 2009-01-01
Supplement: c2dt12002j_4.pdf [file c2dt12002j_4.pdf]

MI L-53\_Cr\_wi th1C02uc-NP20MPa

data\_MIL-53(Cr)wi th1C02uc-NP20MPa

\_audit\_creation\_date 2011-10-21  
\_audit\_creation\_method 'Materials Studi o'  
\_symmetry\_space\_group\_name\_H-M 'P1'  
\_symmetry\_Int\_Tables\_number 1  
\_symmetry\_cell\_setting triclinic

loop\_

\_symmetry\_equiv\_pos\_as\_xyz

x, y, z

\_cell\_length\_a 19.1520  
\_cell\_length\_b 8.5540  
\_cell\_length\_c 6.5950  
\_cell\_angle\_alpha 90.0000  
\_cell\_angle\_beta 93.7700  
\_cell\_angle\_gamma 90.0000

loop\_

\_atom\_site\_label

\_atom\_site\_type\_symbol

\_atom\_site\_fract\_x

\_atom\_site\_fract\_y

\_atom\_site\_fract\_z

\_atom\_site\_U\_iso\_or\_equiv

\_atom\_site\_adp\_type

\_atom\_site\_occupancy

|     |   |         |         |         |         |      |      |
|-----|---|---------|---------|---------|---------|------|------|
| O1  | O | 0.56672 | 0.34495 | 0.94960 | 0.04000 | Uiso | 1.00 |
| C2  | C | 0.72497 | 0.29524 | 0.79078 | 0.04000 | Uiso | 1.00 |
| H3  | H | 0.70666 | 0.32052 | 0.63562 | 0.04000 | Uiso | 1.00 |
| O4  | O | 0.08243 | 0.11700 | 0.15910 | 0.04000 | Uiso | 1.00 |
| C5  | C | 0.20350 | 0.26879 | 0.62276 | 0.04000 | Uiso | 1.00 |
| H6  | H | 0.16911 | 0.29326 | 0.70880 | 0.04000 | Uiso | 1.00 |
| C7  | C | 0.67814 | 0.28274 | 0.91495 | 0.04000 | Uiso | 1.00 |
| C8  | C | 0.60837 | 0.36006 | 0.84584 | 0.04000 | Uiso | 1.00 |
| O9  | O | 0.06672 | 0.84495 | 0.94960 | 0.04000 | Uiso | 1.00 |
| C10 | C | 0.22497 | 0.79524 | 0.79078 | 0.04000 | Uiso | 1.00 |
| H11 | H | 0.20666 | 0.82052 | 0.63562 | 0.04000 | Uiso | 1.00 |
| O12 | O | 0.58243 | 0.61700 | 0.15910 | 0.04000 | Uiso | 1.00 |
| C13 | C | 0.70350 | 0.76879 | 0.62276 | 0.04000 | Uiso | 1.00 |
| H14 | H | 0.66911 | 0.79326 | 0.70880 | 0.04000 | Uiso | 1.00 |
| C15 | C | 0.17814 | 0.78274 | 0.91495 | 0.04000 | Uiso | 1.00 |
| C16 | C | 0.10837 | 0.86006 | 0.84584 | 0.04000 | Uiso | 1.00 |
| O17 | O | 0.43328 | 0.34495 | 0.55040 | 0.04000 | Uiso | 1.00 |
| C18 | C | 0.27503 | 0.29524 | 0.70922 | 0.04000 | Uiso | 1.00 |
| H19 | H | 0.29334 | 0.32052 | 0.86438 | 0.04000 | Uiso | 1.00 |
| O20 | O | 0.91757 | 0.11700 | 0.34090 | 0.04000 | Uiso | 1.00 |
| C21 | C | 0.79650 | 0.26879 | 0.87724 | 0.04000 | Uiso | 1.00 |
| H22 | H | 0.83089 | 0.29326 | 0.79120 | 0.04000 | Uiso | 1.00 |
| C23 | C | 0.32186 | 0.28274 | 0.58505 | 0.04000 | Uiso | 1.00 |
| C24 | C | 0.39163 | 0.36006 | 0.65416 | 0.04000 | Uiso | 1.00 |
| O25 | O | 0.93328 | 0.84495 | 0.55040 | 0.04000 | Uiso | 1.00 |
| C26 | C | 0.77503 | 0.79524 | 0.70922 | 0.04000 | Uiso | 1.00 |
| H27 | H | 0.79334 | 0.82052 | 0.86438 | 0.04000 | Uiso | 1.00 |
| O28 | O | 0.41757 | 0.61700 | 0.34090 | 0.04000 | Uiso | 1.00 |
| C29 | C | 0.29650 | 0.76879 | 0.87724 | 0.04000 | Uiso | 1.00 |
| H30 | H | 0.33089 | 0.79326 | 0.79120 | 0.04000 | Uiso | 1.00 |
| C31 | C | 0.82186 | 0.78274 | 0.58505 | 0.04000 | Uiso | 1.00 |
| C32 | C | 0.89163 | 0.86006 | 0.65416 | 0.04000 | Uiso | 1.00 |
| O33 | O | 0.43328 | 0.65505 | 0.05040 | 0.04000 | Uiso | 1.00 |
| C34 | C | 0.27503 | 0.70476 | 0.20922 | 0.04000 | Uiso | 1.00 |
| H35 | H | 0.29334 | 0.67948 | 0.36438 | 0.04000 | Uiso | 1.00 |
| O36 | O | 0.91757 | 0.88300 | 0.84090 | 0.04000 | Uiso | 1.00 |
| C37 | C | 0.79650 | 0.73121 | 0.37724 | 0.04000 | Uiso | 1.00 |
| H38 | H | 0.83089 | 0.70674 | 0.29120 | 0.04000 | Uiso | 1.00 |
| C39 | C | 0.32186 | 0.71726 | 0.08505 | 0.04000 | Uiso | 1.00 |
| C40 | C | 0.39163 | 0.63994 | 0.15416 | 0.04000 | Uiso | 1.00 |
| O41 | O | 0.93328 | 0.15505 | 0.05040 | 0.04000 | Uiso | 1.00 |
| C42 | C | 0.77503 | 0.20476 | 0.20922 | 0.04000 | Uiso | 1.00 |
| H43 | H | 0.79334 | 0.17948 | 0.36438 | 0.04000 | Uiso | 1.00 |
| O44 | O | 0.41757 | 0.38300 | 0.84090 | 0.04000 | Uiso | 1.00 |

MIL-53\_Cr\_with1CO2uc-NP20MPa

|      |    |         |         |         |         |       |      |
|------|----|---------|---------|---------|---------|-------|------|
| C45  | C  | 0.29650 | 0.23121 | 0.37724 | 0.04000 | Ui so | 1.00 |
| H46  | H  | 0.33089 | 0.20674 | 0.29120 | 0.04000 | Ui so | 1.00 |
| C47  | C  | 0.82186 | 0.21726 | 0.08505 | 0.04000 | Ui so | 1.00 |
| C48  | C  | 0.89163 | 0.13994 | 0.15416 | 0.04000 | Ui so | 1.00 |
| O49  | O  | 0.56672 | 0.65505 | 0.44960 | 0.04000 | Ui so | 1.00 |
| C50  | C  | 0.72497 | 0.70476 | 0.29078 | 0.04000 | Ui so | 1.00 |
| H51  | H  | 0.70666 | 0.67948 | 0.13562 | 0.04000 | Ui so | 1.00 |
| O52  | O  | 0.08243 | 0.88300 | 0.65910 | 0.04000 | Ui so | 1.00 |
| C53  | C  | 0.20350 | 0.73121 | 0.12276 | 0.04000 | Ui so | 1.00 |
| H54  | H  | 0.16911 | 0.70674 | 0.20880 | 0.04000 | Ui so | 1.00 |
| C55  | C  | 0.67814 | 0.71726 | 0.41495 | 0.04000 | Ui so | 1.00 |
| C56  | C  | 0.60837 | 0.63994 | 0.34584 | 0.04000 | Ui so | 1.00 |
| O57  | O  | 0.06672 | 0.15505 | 0.44960 | 0.04000 | Ui so | 1.00 |
| C58  | C  | 0.22497 | 0.20476 | 0.29078 | 0.04000 | Ui so | 1.00 |
| H59  | H  | 0.20666 | 0.17948 | 0.13562 | 0.04000 | Ui so | 1.00 |
| O60  | O  | 0.58243 | 0.38300 | 0.65910 | 0.04000 | Ui so | 1.00 |
| C61  | C  | 0.70350 | 0.23121 | 0.12276 | 0.04000 | Ui so | 1.00 |
| H62  | H  | 0.66911 | 0.20674 | 0.20880 | 0.04000 | Ui so | 1.00 |
| C63  | C  | 0.17814 | 0.21726 | 0.41495 | 0.04000 | Ui so | 1.00 |
| C64  | C  | 0.10837 | 0.13994 | 0.34584 | 0.04000 | Ui so | 1.00 |
| Cr65 | Cr | 0.50000 | 0.50000 | 1.00000 | 0.04000 | Ui so | 1.00 |
| Cr66 | Cr | 0.00000 | 1.00000 | 1.00000 | 0.04000 | Ui so | 1.00 |
| Cr67 | Cr | 0.50000 | 0.50000 | 0.50000 | 0.04000 | Ui so | 1.00 |
| Cr68 | Cr | 0.00000 | 1.00000 | 0.50000 | 0.04000 | Ui so | 1.00 |
| O69  | O  | 0.50000 | 0.63174 | 0.75000 | 0.04000 | Ui so | 1.00 |
| O70  | O  | 0.00000 | 0.13174 | 0.75000 | 0.04000 | Ui so | 1.00 |
| O71  | O  | 0.50000 | 0.36826 | 0.25000 | 0.04000 | Ui so | 1.00 |
| O72  | O  | 0.00000 | 0.86826 | 0.25000 | 0.04000 | Ui so | 1.00 |
| H73  | H  | 0.00000 | 0.22865 | 0.75000 | 0.04000 | Ui so | 1.00 |
| H74  | H  | 0.50000 | 0.72865 | 0.75000 | 0.04000 | Ui so | 1.00 |
| H75  | H  | 0.00000 | 0.77135 | 0.25000 | 0.04000 | Ui so | 1.00 |
| H76  | H  | 0.50000 | 0.27135 | 0.25000 | 0.04000 | Ui so | 1.00 |
| C77  | C  | 1.57466 | 2.97403 | 2.78110 | 0.04000 | Ui so | 1.00 |
| O78  | O  | 1.51549 | 2.98993 | 2.74654 | 0.04000 | Ui so | 1.00 |
| O79  | O  | 1.63375 | 2.96027 | 2.81923 | 0.04000 | Ui so | 1.00 |

loop\_

\_geom\_bond\_atom\_site\_label\_1

\_geom\_bond\_atom\_site\_label\_2

\_geom\_bond\_distance

\_geom\_bond\_site\_symmetry\_2

\_ccdc\_geom\_bond\_type

|     |      |       |       |   |
|-----|------|-------|-------|---|
| 01  | C8   | 1.092 | .     | S |
| 01  | Cr65 | 1.886 | .     | S |
| C2  | H3   | 1.082 | .     | S |
| C2  | C7   | 1.258 | .     | S |
| C2  | C21  | 1.466 | .     | S |
| O4  | C64  | 1.312 | .     | S |
| O4  | Cr66 | 2.092 | 1_544 | S |
| C5  | H6   | 0.921 | .     | S |
| C5  | C63  | 1.490 | .     | S |
| C5  | C18  | 1.466 | .     | S |
| C7  | C8   | 1.533 | .     | S |
| C7  | C61  | 1.490 | 1_556 | S |
| C8  | O60  | 1.312 | .     | S |
| O9  | C16  | 1.092 | .     | S |
| O9  | Cr66 | 1.886 | .     | S |
| C10 | H11  | 1.082 | .     | S |
| C10 | C15  | 1.258 | .     | S |
| C10 | C29  | 1.466 | .     | S |
| O12 | C56  | 1.312 | .     | S |
| O12 | Cr65 | 2.092 | 1_554 | S |
| C13 | H14  | 0.921 | .     | S |
| C13 | C55  | 1.490 | .     | S |
| C13 | C26  | 1.466 | .     | S |
| C15 | C16  | 1.533 | .     | S |
| C15 | C53  | 1.490 | 1_556 | S |
| C16 | O52  | 1.312 | .     | S |
| O17 | C24  | 1.092 | .     | S |

MI L-53\_Cr\_wi th1C02uc-NP20MPa

|      |      |       |       |   |
|------|------|-------|-------|---|
| 017  | Cr67 | 1.886 | .     | S |
| C18  | H19  | 1.082 | .     | S |
| C18  | C23  | 1.258 | .     | S |
| 020  | C48  | 1.312 | .     | S |
| 020  | Cr68 | 2.092 | 1_645 | S |
| C21  | H22  | 0.921 | .     | S |
| C21  | C47  | 1.490 | 1_556 | S |
| C23  | C45  | 1.490 | .     | S |
| C23  | C24  | 1.533 | .     | S |
| C24  | O44  | 1.312 | .     | S |
| 025  | C32  | 1.092 | .     | S |
| 025  | Cr68 | 1.886 | 1_655 | S |
| C26  | H27  | 1.082 | .     | S |
| C26  | C31  | 1.258 | .     | S |
| 028  | C40  | 1.312 | .     | S |
| 028  | Cr67 | 2.092 | .     | S |
| C29  | H30  | 0.921 | .     | S |
| C29  | C39  | 1.490 | 1_556 | S |
| C31  | C37  | 1.490 | .     | S |
| C31  | C32  | 1.533 | .     | S |
| C32  | O36  | 1.312 | .     | S |
| 033  | C40  | 1.092 | .     | S |
| 033  | Cr65 | 1.886 | 1_554 | S |
| C34  | H35  | 1.082 | .     | S |
| C34  | C39  | 1.258 | .     | S |
| C34  | C53  | 1.466 | .     | S |
| 036  | Cr66 | 2.092 | 1_655 | S |
| C37  | H38  | 0.921 | .     | S |
| C37  | C50  | 1.466 | .     | S |
| C39  | C40  | 1.533 | .     | S |
| C39  | C29  | 1.490 | 1_554 | S |
| 041  | C48  | 1.092 | .     | S |
| 041  | Cr66 | 1.886 | 1_644 | S |
| C42  | H43  | 1.082 | .     | S |
| C42  | C47  | 1.258 | .     | S |
| C42  | C61  | 1.466 | .     | S |
| 044  | Cr65 | 2.092 | .     | S |
| C45  | H46  | 0.921 | .     | S |
| C45  | C58  | 1.466 | .     | S |
| C47  | C48  | 1.533 | .     | S |
| C47  | C21  | 1.490 | 1_554 | S |
| 049  | C56  | 1.092 | .     | S |
| 049  | Cr67 | 1.886 | .     | S |
| C50  | H51  | 1.082 | .     | S |
| C50  | C55  | 1.258 | .     | S |
| 052  | Cr68 | 2.092 | .     | S |
| C53  | H54  | 0.921 | .     | S |
| C53  | C15  | 1.490 | 1_554 | S |
| C55  | C56  | 1.533 | .     | S |
| 057  | C64  | 1.092 | .     | S |
| 057  | Cr68 | 1.886 | 1_545 | S |
| C58  | H59  | 1.082 | .     | S |
| C58  | C63  | 1.258 | .     | S |
| 060  | Cr67 | 2.092 | .     | S |
| C61  | H62  | 0.921 | .     | S |
| C61  | C7   | 1.490 | 1_554 | S |
| C63  | C64  | 1.533 | .     | S |
| Cr65 | O69  | 1.997 | .     | S |
| Cr65 | O12  | 2.092 | 1_556 | S |
| Cr65 | O33  | 1.886 | 1_556 | S |
| Cr65 | O71  | 1.997 | 1_556 | S |
| Cr66 | O4   | 2.092 | 1_566 | S |
| Cr66 | O36  | 2.092 | 1_455 | S |
| Cr66 | O41  | 1.886 | 1_466 | S |
| Cr66 | O72  | 1.997 | 1_556 | S |
| Cr66 | O70  | 1.997 | 1_565 | S |
| Cr67 | O71  | 1.997 | .     | S |
| Cr67 | O69  | 1.997 | .     | S |

| MI L-53_Cr_wi th1C02uc-NP20MPa |      |       |       |   |
|--------------------------------|------|-------|-------|---|
| Cr68                           | 072  | 1.997 | .     | S |
| Cr68                           | 020  | 2.092 | 1_465 | S |
| Cr68                           | 025  | 1.886 | 1_455 | S |
| Cr68                           | 057  | 1.886 | 1_565 | S |
| Cr68                           | 070  | 1.997 | 1_565 | S |
| 069                            | H74  | 0.829 | .     | S |
| 070                            | H73  | 0.829 | .     | S |
| 070                            | Cr66 | 1.997 | 1_545 | S |
| 070                            | Cr68 | 1.997 | 1_545 | S |
| 071                            | H76  | 0.829 | .     | S |
| 071                            | Cr65 | 1.997 | 1_554 | S |
| 072                            | H75  | 0.829 | .     | S |
| 072                            | Cr66 | 1.997 | 1_554 | S |
| C77                            | 079  | 1.149 | .     | S |
| C77                            | 078  | 1.149 | .     | S |
