# Supplementary material for: Planes y Directrices
Source: Royal Society of Chemistry journal article supplement (doi:10.1039/c2dt12002j), 2009-01-01
Supplement: c2dt12002j_5.pdf [file c2dt12002j_5.pdf]

MIL-53\_Cr\_with1CO2uc-NP300MPa

data\_MIL-53(Cr)with1CO2uc-NP300MPa-2

\_audit\_creation\_date 2011-10-21  
\_audit\_creation\_method 'Materials Studi o'  
\_symmetry\_space\_group\_name\_H-M 'P1'  
\_symmetry\_Int\_Tables\_number 1  
\_symmetry\_cell\_setting triclinic

loop\_

\_symmetry\_equiv\_pos\_as\_xyz

x, y, z

\_cell\_length\_a 19.2490  
\_cell\_length\_b 7.8750  
\_cell\_length\_c 6.5460  
\_cell\_angle\_alpha 90.0000  
\_cell\_angle\_beta 95.4900  
\_cell\_angle\_gamma 90.0000

loop\_

\_atom\_site\_label

\_atom\_site\_type\_symbol

\_atom\_site\_fract\_x

\_atom\_site\_fract\_y

\_atom\_site\_fract\_z

\_atom\_site\_U\_iso\_or\_equiv

\_atom\_site\_adp\_type

\_atom\_site\_occupancy

|     |   |         |         |         |         |       |      |
|-----|---|---------|---------|---------|---------|-------|------|
| O1  | O | 0.58418 | 0.12032 | 0.15225 | 0.04000 | Ui so | 1.00 |
| C2  | C | 0.70096 | 0.28383 | 0.61682 | 0.04000 | Ui so | 1.00 |
| H3  | H | 0.66501 | 0.31913 | 0.69911 | 0.04000 | Ui so | 1.00 |
| O4  | O | 0.06354 | 0.32630 | 0.93670 | 0.04000 | Ui so | 1.00 |
| C5  | C | 0.22775 | 0.30001 | 0.79026 | 0.04000 | Ui so | 1.00 |
| H6  | H | 0.21165 | 0.32670 | 0.63315 | 0.04000 | Ui so | 1.00 |
| C7  | C | 0.67820 | 0.22602 | 0.40902 | 0.04000 | Ui so | 1.00 |
| C8  | C | 0.60780 | 0.14740 | 0.33873 | 0.04000 | Ui so | 1.00 |
| O9  | O | 0.08418 | 0.62032 | 0.15225 | 0.04000 | Ui so | 1.00 |
| C10 | C | 0.20096 | 0.78383 | 0.61682 | 0.04000 | Ui so | 1.00 |
| H11 | H | 0.16501 | 0.81913 | 0.69911 | 0.04000 | Ui so | 1.00 |
| O12 | O | 0.56354 | 0.82630 | 0.93670 | 0.04000 | Ui so | 1.00 |
| C13 | C | 0.72775 | 0.80001 | 0.79026 | 0.04000 | Ui so | 1.00 |
| H14 | H | 0.71165 | 0.82670 | 0.63315 | 0.04000 | Ui so | 1.00 |
| C15 | C | 0.17820 | 0.72602 | 0.40902 | 0.04000 | Ui so | 1.00 |
| C16 | C | 0.10780 | 0.64740 | 0.33873 | 0.04000 | Ui so | 1.00 |
| O17 | O | 0.41582 | 0.12032 | 0.34775 | 0.04000 | Ui so | 1.00 |
| C18 | C | 0.29904 | 0.28383 | 0.88318 | 0.04000 | Ui so | 1.00 |
| H19 | H | 0.33499 | 0.31913 | 0.80089 | 0.04000 | Ui so | 1.00 |
| O20 | O | 0.93646 | 0.32630 | 0.56330 | 0.04000 | Ui so | 1.00 |
| C21 | C | 0.77225 | 0.30001 | 0.70974 | 0.04000 | Ui so | 1.00 |
| H22 | H | 0.78835 | 0.32670 | 0.86685 | 0.04000 | Ui so | 1.00 |
| C23 | C | 0.32180 | 0.22602 | 0.09098 | 0.04000 | Ui so | 1.00 |
| C24 | C | 0.39220 | 0.14740 | 0.16127 | 0.04000 | Ui so | 1.00 |
| O25 | O | 0.91582 | 0.62032 | 0.34775 | 0.04000 | Ui so | 1.00 |
| C26 | C | 0.79904 | 0.78383 | 0.88318 | 0.04000 | Ui so | 1.00 |
| H27 | H | 0.83499 | 0.81913 | 0.80089 | 0.04000 | Ui so | 1.00 |
| O28 | O | 0.43646 | 0.82630 | 0.56330 | 0.04000 | Ui so | 1.00 |
| C29 | C | 0.27225 | 0.80001 | 0.70974 | 0.04000 | Ui so | 1.00 |
| H30 | H | 0.28835 | 0.82670 | 0.86685 | 0.04000 | Ui so | 1.00 |
| C31 | C | 0.82180 | 0.72602 | 0.09098 | 0.04000 | Ui so | 1.00 |
| C32 | C | 0.89220 | 0.64740 | 0.16127 | 0.04000 | Ui so | 1.00 |
| O33 | O | 0.41582 | 0.87968 | 0.84775 | 0.04000 | Ui so | 1.00 |
| C34 | C | 0.29904 | 0.71617 | 0.38318 | 0.04000 | Ui so | 1.00 |
| H35 | H | 0.33499 | 0.68087 | 0.30089 | 0.04000 | Ui so | 1.00 |
| O36 | O | 0.93646 | 0.67370 | 0.06330 | 0.04000 | Ui so | 1.00 |
| C37 | C | 0.77225 | 0.69999 | 0.20974 | 0.04000 | Ui so | 1.00 |
| H38 | H | 0.78835 | 0.67330 | 0.36685 | 0.04000 | Ui so | 1.00 |
| C39 | C | 0.32180 | 0.77398 | 0.59098 | 0.04000 | Ui so | 1.00 |
| C40 | C | 0.39220 | 0.85260 | 0.66127 | 0.04000 | Ui so | 1.00 |
| O41 | O | 0.91582 | 0.37968 | 0.84775 | 0.04000 | Ui so | 1.00 |
| C42 | C | 0.79904 | 0.21617 | 0.38318 | 0.04000 | Ui so | 1.00 |
| H43 | H | 0.83499 | 0.18087 | 0.30089 | 0.04000 | Ui so | 1.00 |
| O44 | O | 0.43646 | 0.17370 | 0.06330 | 0.04000 | Ui so | 1.00 |

MIL-53\_Cr\_with1CO2uc-NP300MPa

|      |    |          |         |         |         |       |      |
|------|----|----------|---------|---------|---------|-------|------|
| C45  | C  | 0.27225  | 0.19999 | 0.20974 | 0.04000 | Ui so | 1.00 |
| H46  | H  | 0.28835  | 0.17330 | 0.36685 | 0.04000 | Ui so | 1.00 |
| C47  | C  | 0.82180  | 0.27398 | 0.59098 | 0.04000 | Ui so | 1.00 |
| C48  | C  | 0.89220  | 0.35260 | 0.66127 | 0.04000 | Ui so | 1.00 |
| O49  | O  | 0.58418  | 0.87968 | 0.65225 | 0.04000 | Ui so | 1.00 |
| C50  | C  | 0.70096  | 0.71617 | 0.11682 | 0.04000 | Ui so | 1.00 |
| H51  | H  | 0.66501  | 0.68087 | 0.19911 | 0.04000 | Ui so | 1.00 |
| O52  | O  | 0.06354  | 0.67370 | 0.43670 | 0.04000 | Ui so | 1.00 |
| C53  | C  | 0.22775  | 0.69999 | 0.29026 | 0.04000 | Ui so | 1.00 |
| H54  | H  | 0.21165  | 0.67330 | 0.13315 | 0.04000 | Ui so | 1.00 |
| C55  | C  | 0.67820  | 0.77398 | 0.90902 | 0.04000 | Ui so | 1.00 |
| C56  | C  | 0.60780  | 0.85260 | 0.83873 | 0.04000 | Ui so | 1.00 |
| O57  | O  | 0.08418  | 0.37968 | 0.65225 | 0.04000 | Ui so | 1.00 |
| C58  | C  | 0.20096  | 0.21617 | 0.11682 | 0.04000 | Ui so | 1.00 |
| H59  | H  | 0.16501  | 0.18087 | 0.19911 | 0.04000 | Ui so | 1.00 |
| O60  | O  | 0.56354  | 0.17370 | 0.43670 | 0.04000 | Ui so | 1.00 |
| C61  | C  | 0.72775  | 0.19999 | 0.29026 | 0.04000 | Ui so | 1.00 |
| H62  | H  | 0.71165  | 0.17330 | 0.13315 | 0.04000 | Ui so | 1.00 |
| C63  | C  | 0.17820  | 0.27398 | 0.90902 | 0.04000 | Ui so | 1.00 |
| C64  | C  | 0.10780  | 0.35260 | 0.83873 | 0.04000 | Ui so | 1.00 |
| Cr65 | Cr | 0.50000  | 1.00000 | 1.00000 | 0.04000 | Ui so | 1.00 |
| Cr66 | Cr | -0.00000 | 0.50000 | 1.00000 | 0.04000 | Ui so | 1.00 |
| Cr67 | Cr | 0.50000  | 1.00000 | 0.50000 | 0.04000 | Ui so | 1.00 |
| Cr68 | Cr | -0.00000 | 0.50000 | 0.50000 | 0.04000 | Ui so | 1.00 |
| O69  | O  | 0.50000  | 0.85499 | 0.25000 | 0.04000 | Ui so | 1.00 |
| O70  | O  | 0.00000  | 0.35499 | 0.25000 | 0.04000 | Ui so | 1.00 |
| O71  | O  | 0.50000  | 0.14501 | 0.75000 | 0.04000 | Ui so | 1.00 |
| O72  | O  | 0.00000  | 0.64501 | 0.75000 | 0.04000 | Ui so | 1.00 |
| H73  | H  | 0.00000  | 0.24869 | 0.25000 | 0.04000 | Ui so | 1.00 |
| H74  | H  | 0.50000  | 0.74869 | 0.25000 | 0.04000 | Ui so | 1.00 |
| H75  | H  | 0.00000  | 0.75131 | 0.75000 | 0.04000 | Ui so | 1.00 |
| H76  | H  | 0.50000  | 0.25131 | 0.75000 | 0.04000 | Ui so | 1.00 |
| C77  | C  | 1.46353  | 1.53804 | 4.84723 | 0.04000 | Ui so | 1.00 |
| O78  | O  | 1.42216  | 1.57527 | 4.95476 | 0.04000 | Ui so | 1.00 |
| O79  | O  | 1.50562  | 1.50570 | 4.74000 | 0.04000 | Ui so | 1.00 |

loop\_

\_geom\_bond\_atom\_site\_label\_1

\_geom\_bond\_atom\_site\_label\_2

\_geom\_bond\_distance

\_geom\_bond\_site\_symmetry\_2

\_ccdc\_geom\_bond\_type

|     |      |       |       |   |
|-----|------|-------|-------|---|
| O1  | C8   | 1.279 | .     | S |
| O1  | Cr65 | 2.051 | 1_544 | S |
| C2  | H3   | 0.958 | .     | S |
| C2  | C7   | 1.461 | .     | S |
| C2  | C21  | 1.452 | .     | S |
| O4  | Cr66 | 1.907 | .     | S |
| O4  | C64  | 1.133 | .     | S |
| C5  | C18  | 1.452 | .     | S |
| C5  | C63  | 1.303 | .     | S |
| C5  | H6   | 1.066 | .     | S |
| C7  | C61  | 1.303 | .     | S |
| C7  | C8   | 1.521 | .     | S |
| C8  | O60  | 1.133 | .     | S |
| O9  | C16  | 1.279 | .     | S |
| O9  | Cr66 | 2.051 | 1_554 | S |
| C10 | H11  | 0.958 | .     | S |
| C10 | C15  | 1.461 | .     | S |
| C10 | C29  | 1.452 | .     | S |
| O12 | Cr65 | 1.907 | .     | S |
| O12 | C56  | 1.133 | .     | S |
| C13 | C26  | 1.452 | .     | S |
| C13 | C55  | 1.303 | .     | S |
| C13 | H14  | 1.066 | .     | S |
| C15 | C53  | 1.303 | .     | S |
| C15 | C16  | 1.521 | .     | S |
| C16 | O52  | 1.133 | .     | S |
| O17 | C24  | 1.279 | .     | S |

MIL-53\_Cr\_wi th1CO2uc-NP300MPa

|      |      |       |       |   |
|------|------|-------|-------|---|
| 017  | Cr67 | 2.051 | 1_545 | S |
| C18  | H19  | 0.958 | .     | S |
| C18  | C23  | 1.461 | 1_556 | S |
| 020  | C48  | 1.133 | .     | S |
| 020  | Cr68 | 1.907 | 1_655 | S |
| C21  | C47  | 1.303 | .     | S |
| C21  | H22  | 1.066 | .     | S |
| C23  | C45  | 1.303 | .     | S |
| C23  | C24  | 1.521 | .     | S |
| C23  | C18  | 1.461 | 1_554 | S |
| C24  | O44  | 1.133 | .     | S |
| 025  | C32  | 1.279 | .     | S |
| 025  | Cr68 | 2.051 | 1_655 | S |
| C26  | H27  | 0.958 | .     | S |
| C26  | C31  | 1.461 | 1_556 | S |
| 028  | Cr67 | 1.907 | .     | S |
| 028  | C40  | 1.133 | .     | S |
| C29  | C39  | 1.303 | .     | S |
| C29  | H30  | 1.066 | .     | S |
| C31  | C37  | 1.303 | .     | S |
| C31  | C32  | 1.521 | .     | S |
| C31  | C26  | 1.461 | 1_554 | S |
| C32  | O36  | 1.133 | .     | S |
| 033  | Cr65 | 2.051 | .     | S |
| 033  | C40  | 1.279 | .     | S |
| C34  | H35  | 0.958 | .     | S |
| C34  | C39  | 1.461 | .     | S |
| C34  | C53  | 1.452 | .     | S |
| 036  | Cr66 | 1.907 | 1_654 | S |
| C37  | C50  | 1.452 | .     | S |
| C37  | H38  | 1.066 | .     | S |
| C39  | C40  | 1.521 | .     | S |
| 041  | C48  | 1.279 | .     | S |
| 041  | Cr66 | 2.051 | 1_655 | S |
| C42  | H43  | 0.958 | .     | S |
| C42  | C47  | 1.461 | .     | S |
| C42  | C61  | 1.452 | .     | S |
| 044  | Cr65 | 1.907 | 1_544 | S |
| C45  | C58  | 1.452 | .     | S |
| C45  | H46  | 1.066 | .     | S |
| C47  | C48  | 1.521 | .     | S |
| 049  | Cr67 | 2.051 | .     | S |
| 049  | C56  | 1.279 | .     | S |
| C50  | H51  | 0.958 | .     | S |
| C50  | C55  | 1.461 | 1_554 | S |
| 052  | Cr68 | 1.907 | .     | S |
| C53  | H54  | 1.066 | .     | S |
| C55  | C56  | 1.521 | .     | S |
| C55  | C50  | 1.461 | 1_556 | S |
| 057  | Cr68 | 2.051 | .     | S |
| 057  | C64  | 1.279 | .     | S |
| C58  | H59  | 0.958 | .     | S |
| C58  | C63  | 1.461 | 1_554 | S |
| 060  | Cr67 | 1.907 | 1_545 | S |
| C61  | H62  | 1.066 | .     | S |
| C63  | C64  | 1.521 | .     | S |
| C63  | C58  | 1.461 | 1_556 | S |
| Cr65 | O1   | 2.051 | 1_566 | S |
| Cr65 | O44  | 1.907 | 1_566 | S |
| Cr65 | O71  | 1.996 | 1_565 | S |
| Cr65 | O69  | 1.996 | 1_556 | S |
| Cr66 | O72  | 1.996 | .     | S |
| Cr66 | O9   | 2.051 | 1_556 | S |
| Cr66 | O36  | 1.907 | 1_456 | S |
| Cr66 | O41  | 2.051 | 1_455 | S |
| Cr66 | O70  | 1.996 | 1_556 | S |
| Cr67 | O69  | 1.996 | .     | S |
| Cr67 | O17  | 2.051 | 1_565 | S |

| MIL-53_Cr_wi th1CO2uc-NP300MPa |      |       |         |
|--------------------------------|------|-------|---------|
| Cr67                           | 060  | 1.907 | 1_565 S |
| Cr67                           | 071  | 1.996 | 1_565 S |
| Cr68                           | 072  | 1.996 | . S     |
| Cr68                           | 070  | 1.996 | . S     |
| Cr68                           | 020  | 1.907 | 1_455 S |
| Cr68                           | 025  | 2.051 | 1_455 S |
| 069                            | H74  | 0.837 | . S     |
| 069                            | Cr65 | 1.996 | 1_554 S |
| 070                            | H73  | 0.837 | . S     |
| 070                            | Cr66 | 1.996 | 1_554 S |
| 071                            | H76  | 0.837 | . S     |
| 071                            | Cr65 | 1.996 | 1_545 S |
| 071                            | Cr67 | 1.996 | 1_545 S |
| 072                            | H75  | 0.837 | . S     |
| C77                            | 078  | 1.150 | . S     |
| C77                            | 079  | 1.150 | . S     |
